# Supplementary material for: Differentially Expressed miRNAs Influence Metabolic Processes in Pituitary Oncocytoma
Source: PubMed Central journal article supplement (PMC6776564; doi:10.1007/s11064-019-02789-2), 2019-04-03
Supplement: 11064_2019_2789_MOESM1_ESM.pdf [file 11064_2019_2789_MOESM1_ESM.pdf]

**Online Resource 1.** Differentially expressed miRNAs in primary and recurrent spindle cell oncocytoma of the pituitary. N: normal pituitary; O: oncocytoma; R: recurrent oncocytoma, BH: Benjamini-Hochberg procedure for fold discovery rate correction

| miRNA Name       | ANOVA   | Fold change | Fisher post-hoc p value | BH adjusted p value | Fold change | Fisher post-hoc p value | BH adjusted p value |
|------------------|---------|-------------|-------------------------|---------------------|-------------|-------------------------|---------------------|
|                  | p value | (O vs. N)   | (O vs. N)               | (O vs. N)           | (R vs. O)   | (R vs. O)               | (R vs. O)           |
| hsa-miR-379-5p   | 0,000   | -2,824      | 0,000                   | 0,000               | -2,251      | 0,000                   | 0,000               |
| hsa-miR-127-3p   | 0,000   | -2,889      | 0,000                   | 0,000               | -2,272      | 0,000                   | 0,001               |
| hsa-miR-154-5p   | 0,002   | -2,347      | 0,001                   | 0,004               | -2,044      | 0,002                   | 0,004               |
| hsa-miR-382-5p   | 0,003   | -2,124      | 0,002                   | 0,005               | -1,872      | 0,003                   | 0,005               |
| hsa-miR-369-5p   | 0,000   | -3,578      | 0,000                   | 0,000               | -2,596      | 0,005                   | 0,005               |
| hsa-miR-411-5p   | 0,006   | -1,806      | 0,004                   | 0,011               | -1,513      | 0,008                   | 0,012               |
| hsa-miR-494-3p   | 0,003   | -2,258      | 0,001                   | 0,003               | -1,350      | 0,030                   | 0,030               |
| hsa-miR-146b-5p  | 0,096   | -0,185      | 0,929                   | 0,929               | -2,094      | 0,046                   | 0,137               |
| hsa-miR-299-5p   | 0,002   | -1,535      | 0,001                   | 0,002               | -0,646      | 0,073                   | 0,073               |
| hsa-miR-874-5p   | 0,082   | -0,306      | 0,382                   | 0,382               | 0,883       | 0,083                   | 0,125               |
| hsa-miR-136-3p   | 0,051   | -2,069      | 0,022                   | 0,065               | -1,492      | 0,096                   | 0,143               |
| hsa-miR-376b-3p  | 0,002   | -2,439      | 0,001                   | 0,002               | -1,089      | 0,099                   | 0,099               |
| hsa-miR-744-5p   | 0,001   | -1,522      | 0,002                   | 0,002               | 1,246       | 0,106                   | 0,106               |
| hsa-miR-376a-3p  | 0,042   | -1,777      | 0,016                   | 0,049               | -1,129      | 0,117                   | 0,161               |
| hsa-miR-455-3p   | 0,079   | 2,569       | 0,035                   | 0,104               | 0,909       | 0,134                   | 0,201               |
| hsa-miR-551b-3p  | 0,002   | -1,793      | 0,002                   | 0,003               | 1,495       | 0,167                   | 0,167               |
| hsa-miR-485-3p   | 0,006   | -1,714      | 0,002                   | 0,006               | -0,669      | 0,175                   | 0,175               |
| hsa-miR-654-3p   | 0,004   | -3,323      | 0,002                   | 0,005               | -1,532      | 0,240                   | 0,240               |
| hsa-miR-769-3p   | 0,090   | -0,577      | 0,138                   | 0,206               | 0,579       | 0,240                   | 0,240               |
| hsa-miR-598-3p   | 0,121   | -0,900      | 0,155                   | 0,233               | 1,067       | 0,309                   | 0,309               |
| hsa-miR-381-3p   | 0,004   | -3,065      | 0,001                   | 0,004               | -1,204      | 0,309                   | 0,309               |
| hsa-miR-409-3p   | 0,002   | -3,010      | 0,001                   | 0,003               | -1,062      | 0,327                   | 0,327               |
| hsa-miR-574-3p   | 0,024   | -1,147      | 0,021                   | 0,032               | 0,580       | 0,375                   | 0,375               |
| hsa-miR-129-2-3p | 0,042   | -1,869      | 0,034                   | 0,051               | 1,472       | 0,482                   | 0,482               |
| hsa-miR-95-3p    | 0,069   | -0,549      | 0,056                   | 0,085               | 0,197       | 0,489                   | 0,489               |
| hsa-miR-370-3p   | 0,005   | -2,257      | 0,002                   | 0,005               | -0,544      | 0,494                   | 0,494               |
| hsa-miR-129-1-3p | 0,112   | -2,032      | 0,045                   | 0,136               | -0,768      | 0,539                   | 0,539               |
| hsa-miR-485-5p   | 0,001   | -2,569      | 0,001                   | 0,001               | -0,422      | 0,616                   | 0,616               |
| hsa-miR-129-5p   | 0,002   | -3,538      | 0,001                   | 0,001               | 2,252       | 0,630                   | 0,630               |
| hsa-miR-487b-3p  | 0,028   | -3,893      | 0,012                   | 0,034               | -1,292      | 0,687                   | 0,687               |
| hsa-miR-431-5p   | 0,083   | -2,182      | 0,053                   | 0,080               | 1,058       | 0,704                   | 0,704               |
| hsa-miR-212-5p   | 0,090   | -2,070      | 0,058                   | 0,087               | 0,938       | 0,705                   | 0,705               |
| hsa-miR-1180-3p  | 0,092   | -1,115      | 0,059                   | 0,088               | 0,264       | 0,718                   | 0,718               |
| hsa-miR-148b-3p  | 0,086   | -0,640      | 0,054                   | 0,081               | 0,115       | 0,723                   | 0,723               |
| hsa-miR-409-5p   | 0,006   | -2,305      | 0,003                   | 0,007               | -0,315      | 0,745                   | 0,745               |
| hsa-miR-141-5p   | 0,037   | -2,526      | 0,022                   | 0,032               | 0,839       | 0,757                   | 0,757               |

|                 |       |        |       |       |        |       |       |
|-----------------|-------|--------|-------|-------|--------|-------|-------|
| hsa-miR-7-2-3p  | 0,002 | -2,970 | 0,001 | 0,002 | 0,515  | 0,775 | 0,775 |
| hsa-miR-31-5p   | 0,019 | -1,607 | 0,011 | 0,016 | 0,230  | 0,776 | 0,776 |
| hsa-miR-212-3p  | 0,008 | -3,644 | 0,004 | 0,007 | 1,621  | 0,778 | 0,778 |
| hsa-miR-137     | 0,056 | -3,060 | 0,033 | 0,050 | 1,632  | 0,783 | 0,783 |
| hsa-miR-323a-3p | 0,009 | -4,115 | 0,004 | 0,010 | -0,922 | 0,789 | 0,789 |
| hsa-miR-329-3p  | 0,080 | -2,304 | 0,036 | 0,086 | -0,407 | 0,809 | 0,809 |
| hsa-miR-200b-5p | 0,016 | -1,695 | 0,007 | 0,018 | -0,163 | 0,818 | 0,818 |
| hsa-miR-889-3p  | 0,059 | -2,587 | 0,033 | 0,049 | 0,589  | 0,841 | 0,841 |
| hsa-miR-539-3p  | 0,011 | -1,997 | 0,005 | 0,012 | -0,161 | 0,854 | 0,854 |
| hsa-miR-132-5p  | 0,026 | -3,986 | 0,014 | 0,022 | 1,437  | 0,874 | 0,874 |
| hsa-miR-7-5p    | 0,000 | -5,872 | 0,000 | 0,000 | 2,156  | 0,892 | 0,892 |
| hsa-miR-376c-3p | 0,102 | -2,207 | 0,048 | 0,101 | -0,233 | 0,897 | 0,897 |
| hsa-miR-182-5p  | 0,002 | -4,557 | 0,001 | 0,002 | 0,682  | 0,911 | 0,911 |
| hsa-miR-361-5p  | 0,048 | -0,924 | 0,025 | 0,041 | 0,045  | 0,913 | 0,913 |
| hsa-miR-431-3p  | 0,000 | -2,897 | 0,000 | 0,000 | 0,066  | 0,921 | 0,921 |
| hsa-miR-183-5p  | 0,001 | -5,473 | 0,000 | 0,001 | 1,092  | 0,926 | 0,926 |
| hsa-miR-200a-5p | 0,002 | -4,864 | 0,001 | 0,002 | -0,292 | 0,960 | 0,960 |
| hsa-miR-375     | 0,016 | -5,252 | 0,008 | 0,015 | 0,717  | 0,964 | 0,964 |
| hsa-miR-96-5p   | 0,009 | -4,551 | 0,004 | 0,009 | -0,237 | 0,969 | 0,969 |
| hsa-miR-200a-3p | 0,008 | -5,137 | 0,004 | 0,008 | 0,431  | 0,971 | 0,971 |
| hsa-miR-141-3p  | 0,009 | -5,022 | 0,004 | 0,008 | 0,354  | 0,974 | 0,974 |
| hsa-miR-200c-3p | 0,006 | -5,900 | 0,003 | 0,006 | 0,639  | 0,975 | 0,975 |
| hsa-miR-429     | 0,015 | -5,460 | 0,007 | 0,013 | 0,531  | 0,975 | 0,975 |
| hsa-miR-132-3p  | 0,014 | -4,408 | 0,007 | 0,013 | 0,193  | 0,978 | 0,978 |
| hsa-miR-196b-5p | 0,049 | 2,110  | 0,025 | 0,044 | -0,008 | 0,982 | 0,982 |
| hsa-miR-200b-3p | 0,005 | -5,351 | 0,003 | 0,005 | 0,048  | 0,996 | 0,996 |
| hsa-miR-323b-3p | 0,005 | -3,680 | 0,002 | 0,005 | 0,013  | 0,997 | 0,997 |
| hsa-miR-128-3p  | 0,016 | -1,468 | 0,008 | 0,015 | 0,001  | 0,999 | 0,999 |
