# Supplementary material for: Differentially Expressed miRNAs Influence Metabolic Processes in Pituitary Oncocytoma
Source: PubMed Central journal article supplement (PMC6776564; doi:10.1007/s11064-019-02789-2), 2019-04-03
Supplement: 11064_2019_2789_MOESM2_ESM.pdf [file 11064_2019_2789_MOESM2_ESM.pdf]

**Online Resource 2** Pathway analysis of miRNA regulated genes in pituitary oncocyoma vs. normal tissue by Panther Classification System

| <b>Pathway accession</b> | <b>Pathway Name</b>                                                               | <b>Components</b> | <b>Subfamilies</b> | <b>Associated sequence</b> |
|--------------------------|-----------------------------------------------------------------------------------|-------------------|--------------------|----------------------------|
| P00060                   | Ubiquitin proteasome pathway                                                      | 6                 | 107                | 570                        |
| P06664                   | Gonadotropin releasing hormone receptor pathway                                   | 216               | 233                | 235                        |
| P00003                   | Alzheimer disease-amyloid secretase pathway                                       | 31                | 113                | 545                        |
| P00034                   | Integrin signalling pathway                                                       | 46                | 258                | 1312                       |
| P00013                   | Cell cycle                                                                        | 12                | 31                 | 148                        |
| P00051                   | TCA cycle                                                                         | 10                | 24                 | 80                         |
| P02739                   | De novo pyrimidine deoxyribonucleotide biosynthesis                               | 10                | 33                 | 253                        |
| P04397                   | p53 pathway by glucose deprivation                                                | 13                | 28                 | 184                        |
| P05912                   | Dopamine receptor mediated signaling pathway                                      | 27                | 83                 | 428                        |
| P00004                   | Alzheimer disease-presenilin pathway                                              | 70                | 186                | 1056                       |
| P00053                   | T cell activation                                                                 | 45                | 98                 | 564                        |
| P06587                   | Nicotine pharmacodynamics pathway                                                 | 27                | 40                 | 163                        |
| P00047                   | PDGF signaling pathway                                                            | 36                | 207                | 1043                       |
| P00059                   | p53 pathway                                                                       | 70                | 104                | 607                        |
| P00005                   | Angiogenesis                                                                      | 77                | 245                | 1272                       |
| P00057                   | Wnt signaling pathway                                                             | 49                | 464                | 2334                       |
| P00017                   | DNA replication                                                                   | 18                | 49                 | 271                        |
| P00028                   | Heterotrimeric G-protein signaling pathway-rod outer segment phototransduction    | 15                | 51                 | 313                        |
| P00056                   | VEGF signaling pathway                                                            | 25                | 96                 | 495                        |
| P00012                   | Cadherin signaling pathway                                                        | 16                | 223                | 1074                       |
| P00010                   | B cell activation                                                                 | 37                | 78                 | 430                        |
| P00026                   | Heterotrimeric G-protein signaling pathway-Gi alpha and Gs alpha mediated pathway | 27                | 201                | 1130                       |
| P06959                   | CCKR signaling map                                                                | 290               | 171                | 171                        |
| P00042                   | Muscarinic acetylcholine receptor 1 and 3 signaling pathway                       | 12                | 97                 | 515                        |
