# Supplementary material for: Differentially Expressed miRNAs Influence Metabolic Processes in Pituitary Oncocytoma
Source: PubMed Central journal article supplement (PMC6776564; doi:10.1007/s11064-019-02789-2), 2019-04-03
Supplement: 11064_2019_2789_MOESM3_ESM.pdf [file 11064_2019_2789_MOESM3_ESM.pdf]

## PANTHER GO-Slim Biological Process

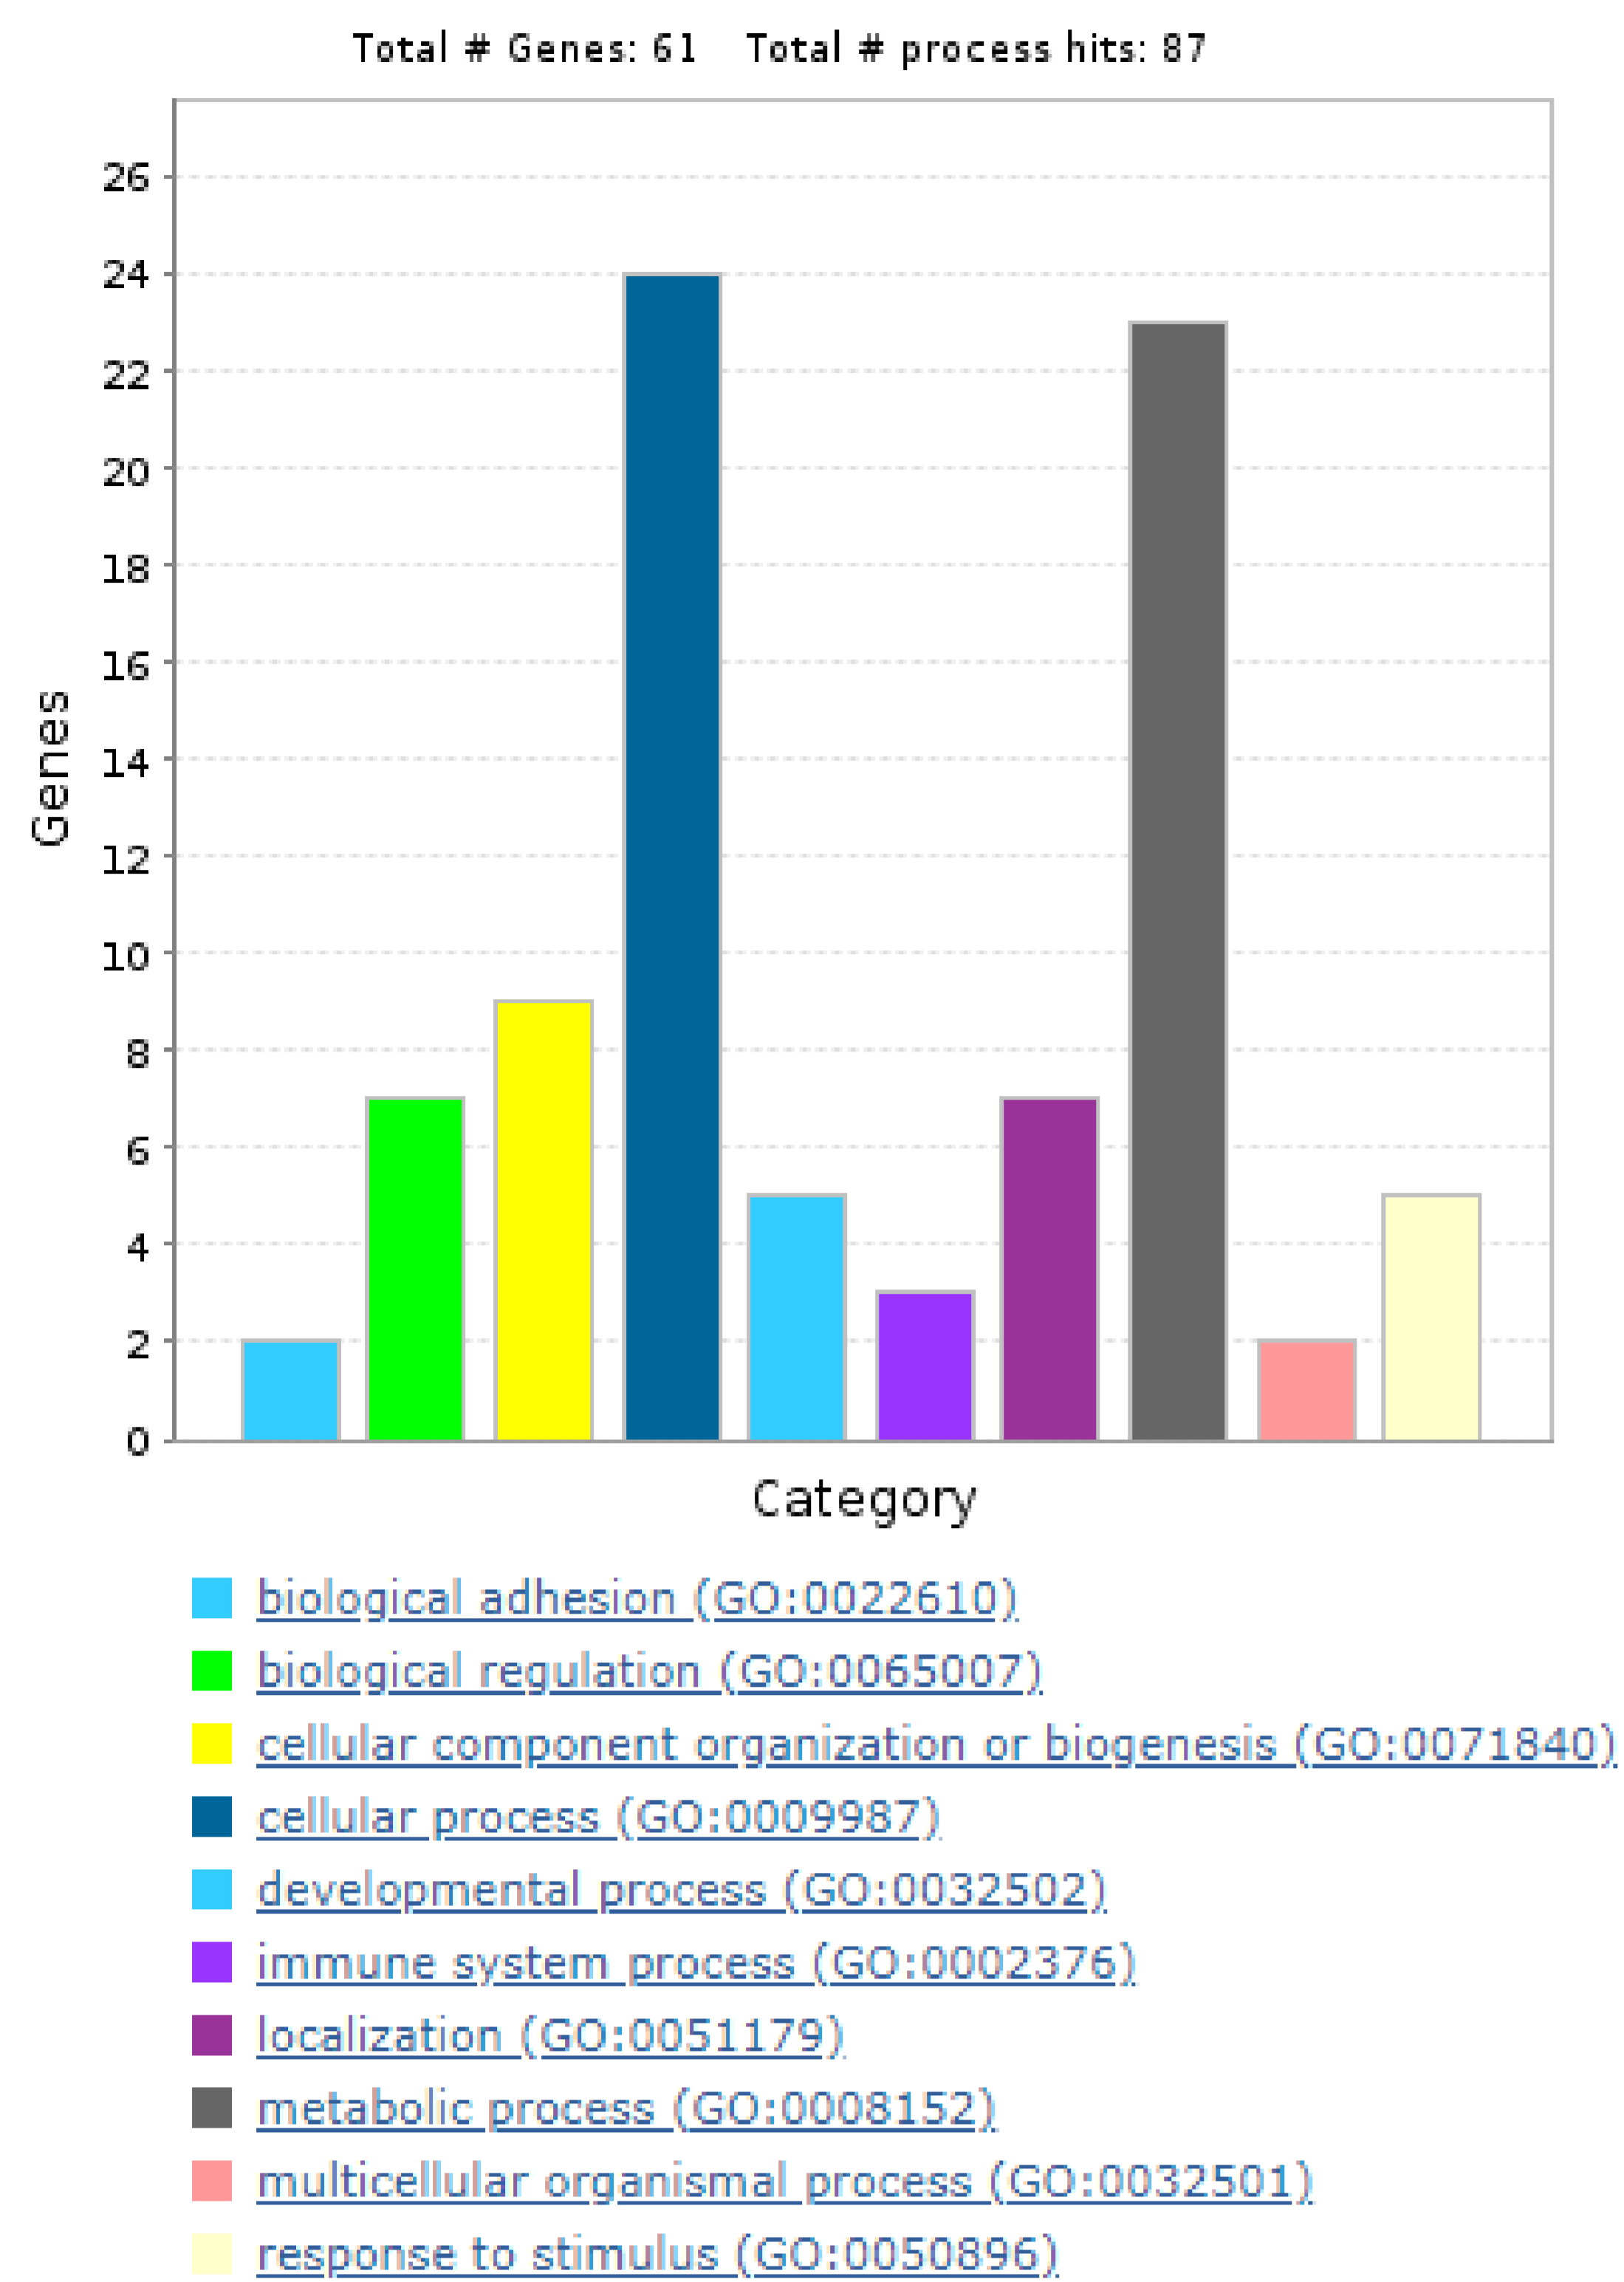

## PANTHER GO-Slim Molecular Function

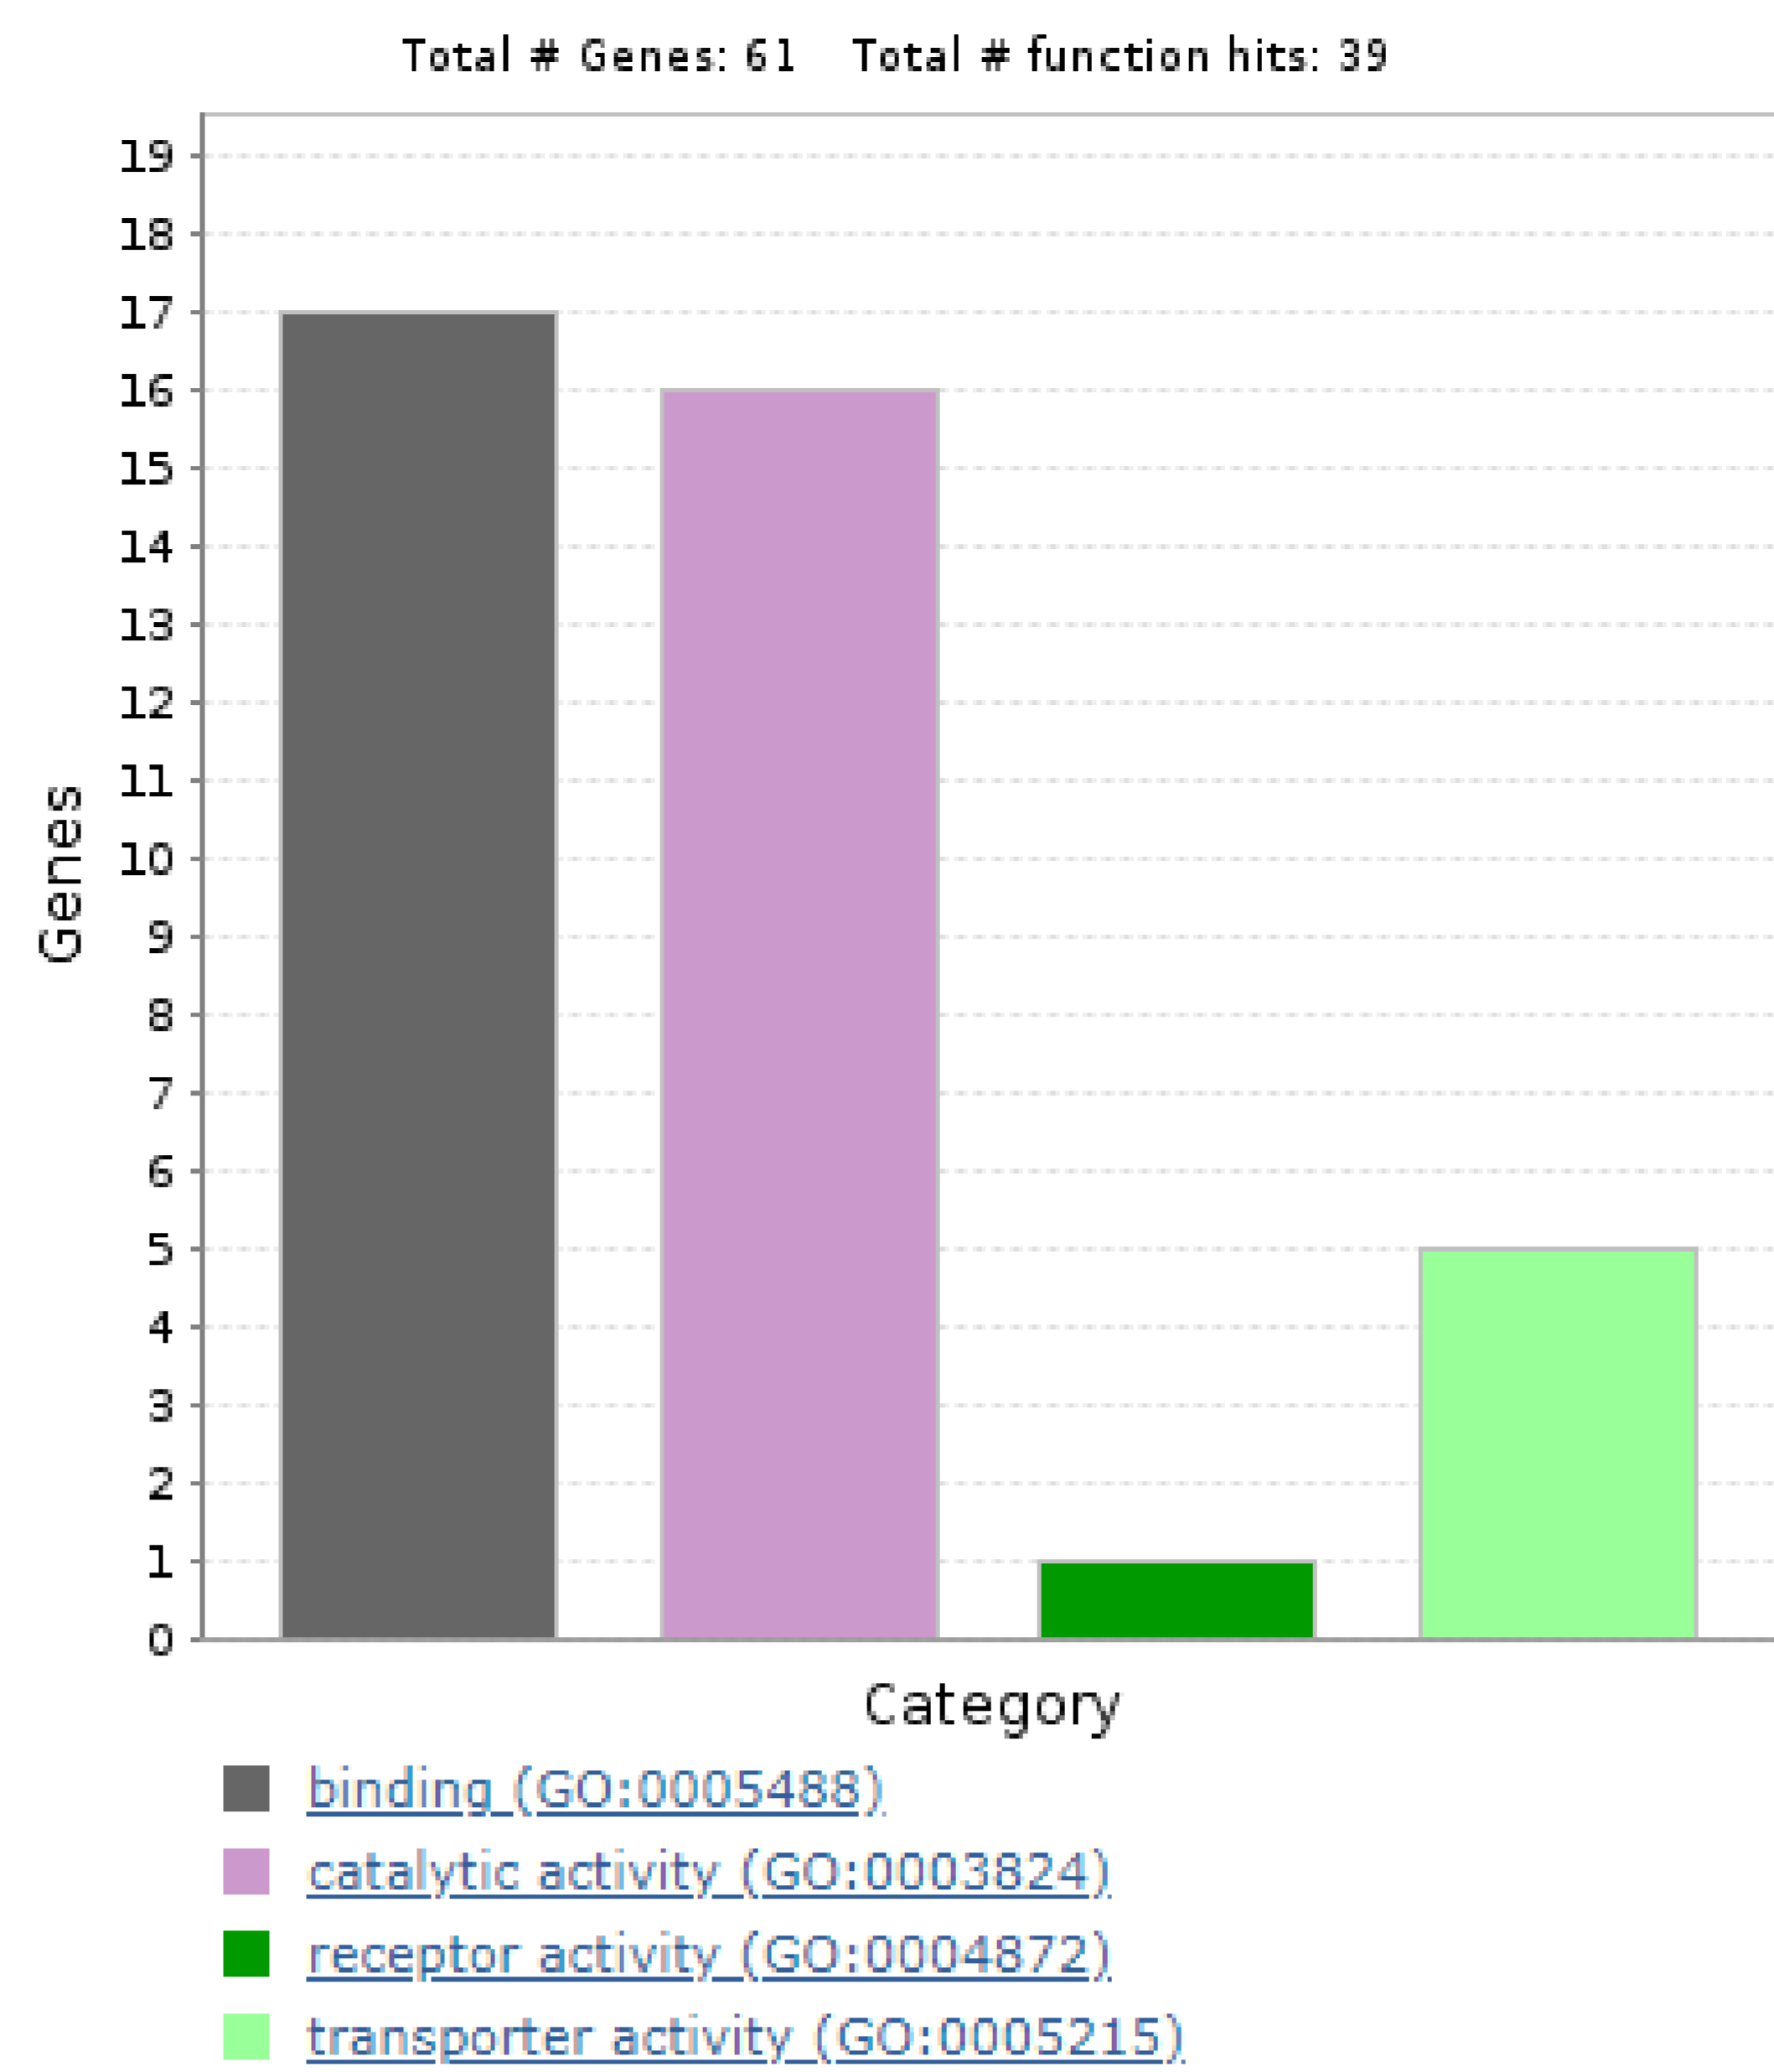

\*\*Chart tooltips are read as: Category name (Accession): # genes; Percent of gene hit against total # genes; Percent of gene hit against total # Function hits
