# Supplementary material for: Differentially Expressed miRNAs Influence Metabolic Processes in Pituitary Oncocytoma
Source: PubMed Central journal article supplement (PMC6776564; doi:10.1007/s11064-019-02789-2), 2019-04-03
Supplement: 11064_2019_2789_MOESM4_ESM.pdf [file 11064_2019_2789_MOESM4_ESM.pdf]

**Online Resource 4** miRNA regulated genes associated with Cellular and Metabolic process GO terms

| Cellular process |                                                                                          | Metabolic process |                                                                                          |
|------------------|------------------------------------------------------------------------------------------|-------------------|------------------------------------------------------------------------------------------|
| Symbol           | Gene name                                                                                | Symbol            | Gene name                                                                                |
| TBC1D2B          | TBC1 domain family member 2B;TBC1D2B;ortholog                                            | TBC1D2B           | TBC1 domain family member 2B;TBC1D2B;ortholog                                            |
| VPS52            | Vacuolar protein sorting-associated protein 52 homolog;VPS52;ortholog                    | PPP1CC            | Serine/threonine-protein phosphatase PP1-gamma catalytic subunit;PPP1CC;ortholog         |
| PPP1CC           | Serine/threonine-protein phosphatase PP1-gamma catalytic subunit;PPP1CC;ortholog         | KAT5              | Histone acetyltransferase KAT5;KAT5;ortholog                                             |
| RILPL1           | RILP-like protein 1;RILPL1;ortholog                                                      | REER              | Arginine-glutamic acid dipeptide repeats protein;REER;ortholog                           |
| KAT5             | Histone acetyltransferase KAT5;KAT5;ortholog                                             | DTYMK             | Thymidylate kinase;DTYMK;ortholog                                                        |
| REER             | Arginine-glutamic acid dipeptide repeats protein;REER;ortholog                           | ATP2A2            | Sarcoplasmic/endoplasmic reticulum calcium ATPase 2;ATP2A2;ortholog                      |
| DTYMK            | Thymidylate kinase;DTYMK;ortholog                                                        | L3MBTL2           | Lethal(3)malignant brain tumor-like protein 2;L3MBTL2;ortholog                           |
| ATP2A2           | Sarcoplasmic/endoplasmic reticulum calcium ATPase 2;ATP2A2;ortholog                      | PRKAB2            | 5'-AMP-activated protein kinase subunit beta-2;PRKAB2;ortholog                           |
| L3MBTL2          | Lethal(3)malignant brain tumor-like protein 2;L3MBTL2;ortholog                           | PMPCA             | Mitochondrial-processing peptidase subunit alpha;PMPCA;ortholog                          |
| INPP5E           | Mitochondrial-processing peptidase subunit alpha;PMPCA;ortholog                          | KIF21B            | Kinesin-like protein KIF21B;KIF21B;ortholog                                              |
| KIF21B           | Kinesin-like protein KIF21B;KIF21B;ortholog                                              | RFC2              | Replication factor C subunit 2;RFC2;ortholog                                             |
| RFC2             | Replication factor C subunit 2;RFC2;ortholog                                             | CCNB1             | G2/mitotic-specific cyclin-B1;CCNB1;ortholog                                             |
| CCNB1            | G2/mitotic-specific cyclin-B1;CCNB1;ortholog                                             | CRAT              | Carnitine O-acetyltransferase;CRAT;ortholog                                              |
| PKN2             | Serine/threonine-protein kinase N2;PKN2;ortholog                                         | POLE4             | DNA polymerase epsilon subunit 4;POLE4;ortholog                                          |
| CALM1            | Calmodulin;CALM1;ortholog                                                                | PKN2              | Serine/threonine-protein kinase N2;PKN2;ortholog                                         |
| PTK2             | Focal adhesion kinase 1;PTK2;ortholog                                                    | ATP1A4            | Sodium/potassium-transporting ATPase subunit alpha-4;ATP1A4;ortholog                     |
| ATP1A4           | Sodium/potassium-transporting ATPase subunit alpha-4;ATP1A4;ortholog                     | BCKDK             | [3-methyl-2-oxobutanoate dehydrogenase [lipoamide]] kinase, mitochondrial;BCKDK;ortholog |
| BCKDK            | [3-methyl-2-oxobutanoate dehydrogenase [lipoamide]] kinase, mitochondrial;BCKDK;ortholog | ACO2              | Aconitate hydratase, mitochondrial;ACO2;ortholog                                         |
| ACO2             | Aconitate hydratase, mitochondrial;ACO2;ortholog                                         |                   |                                                                                          |
