# Supplementary material for: Differentially Expressed miRNAs Influence Metabolic Processes in Pituitary Oncocytoma
Source: PubMed Central journal article supplement (PMC6776564; doi:10.1007/s11064-019-02789-2), 2019-04-03

## a GO - Biological Process

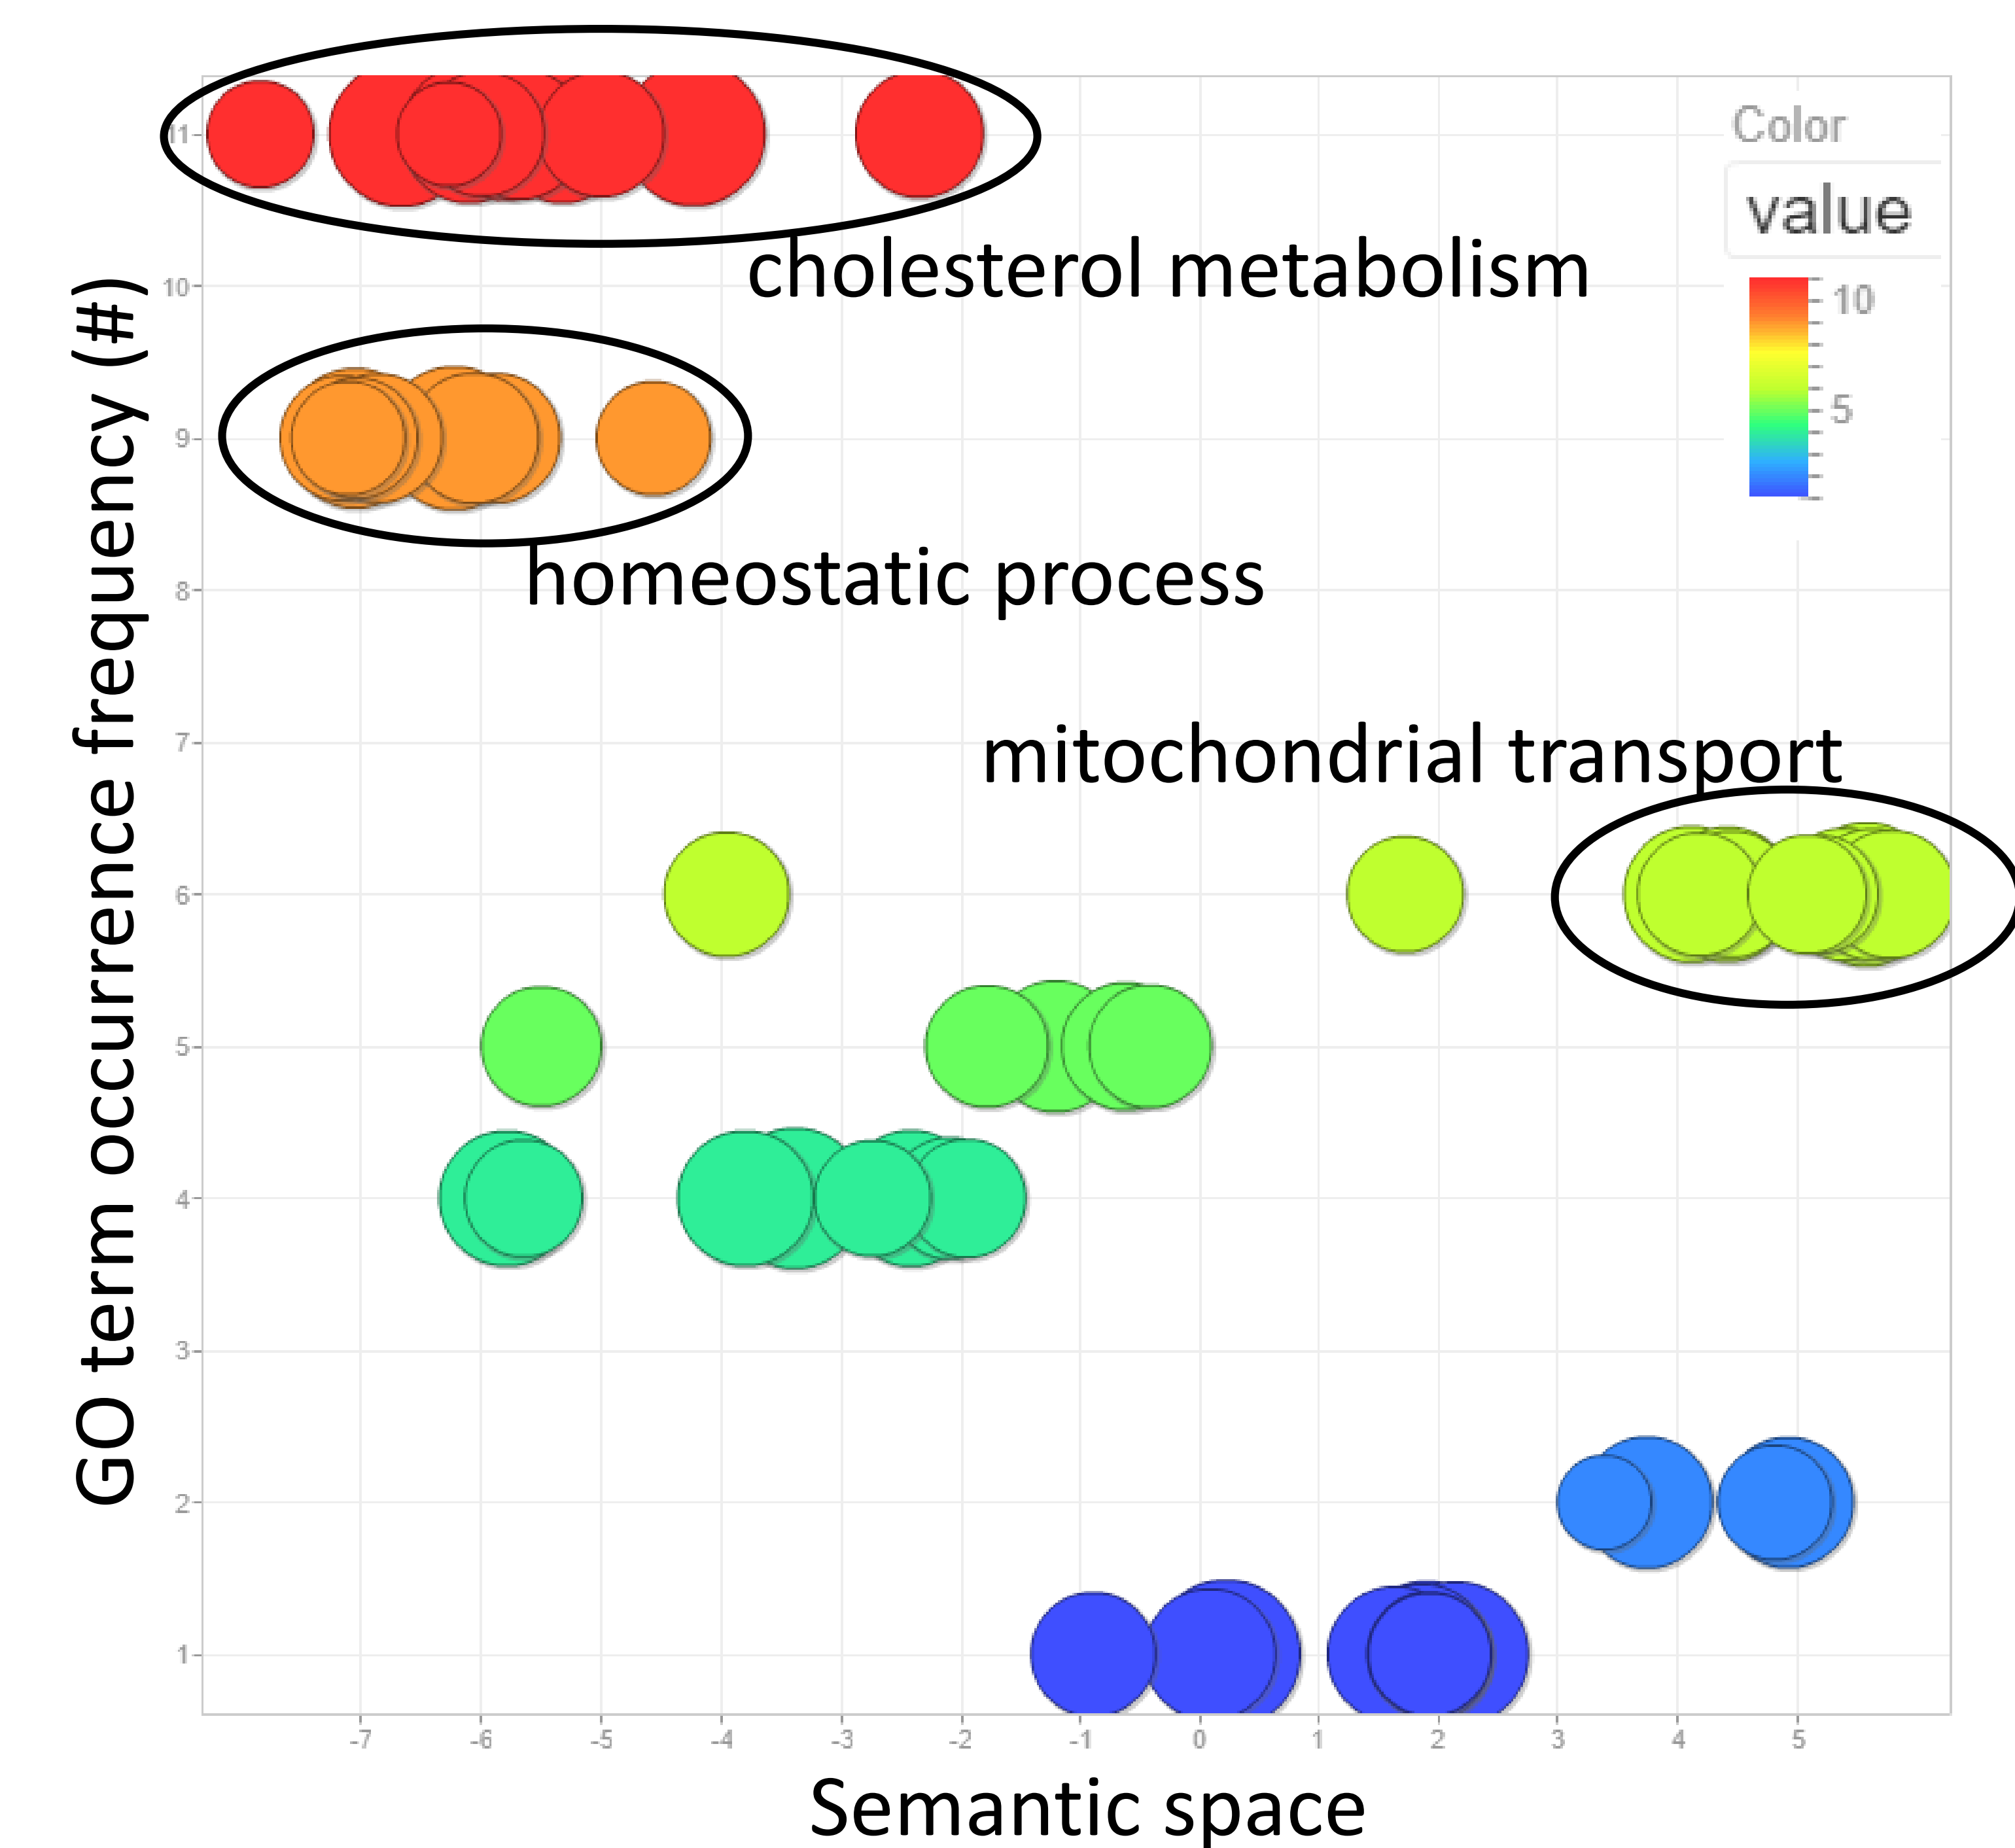

## b GO - Molecular Function

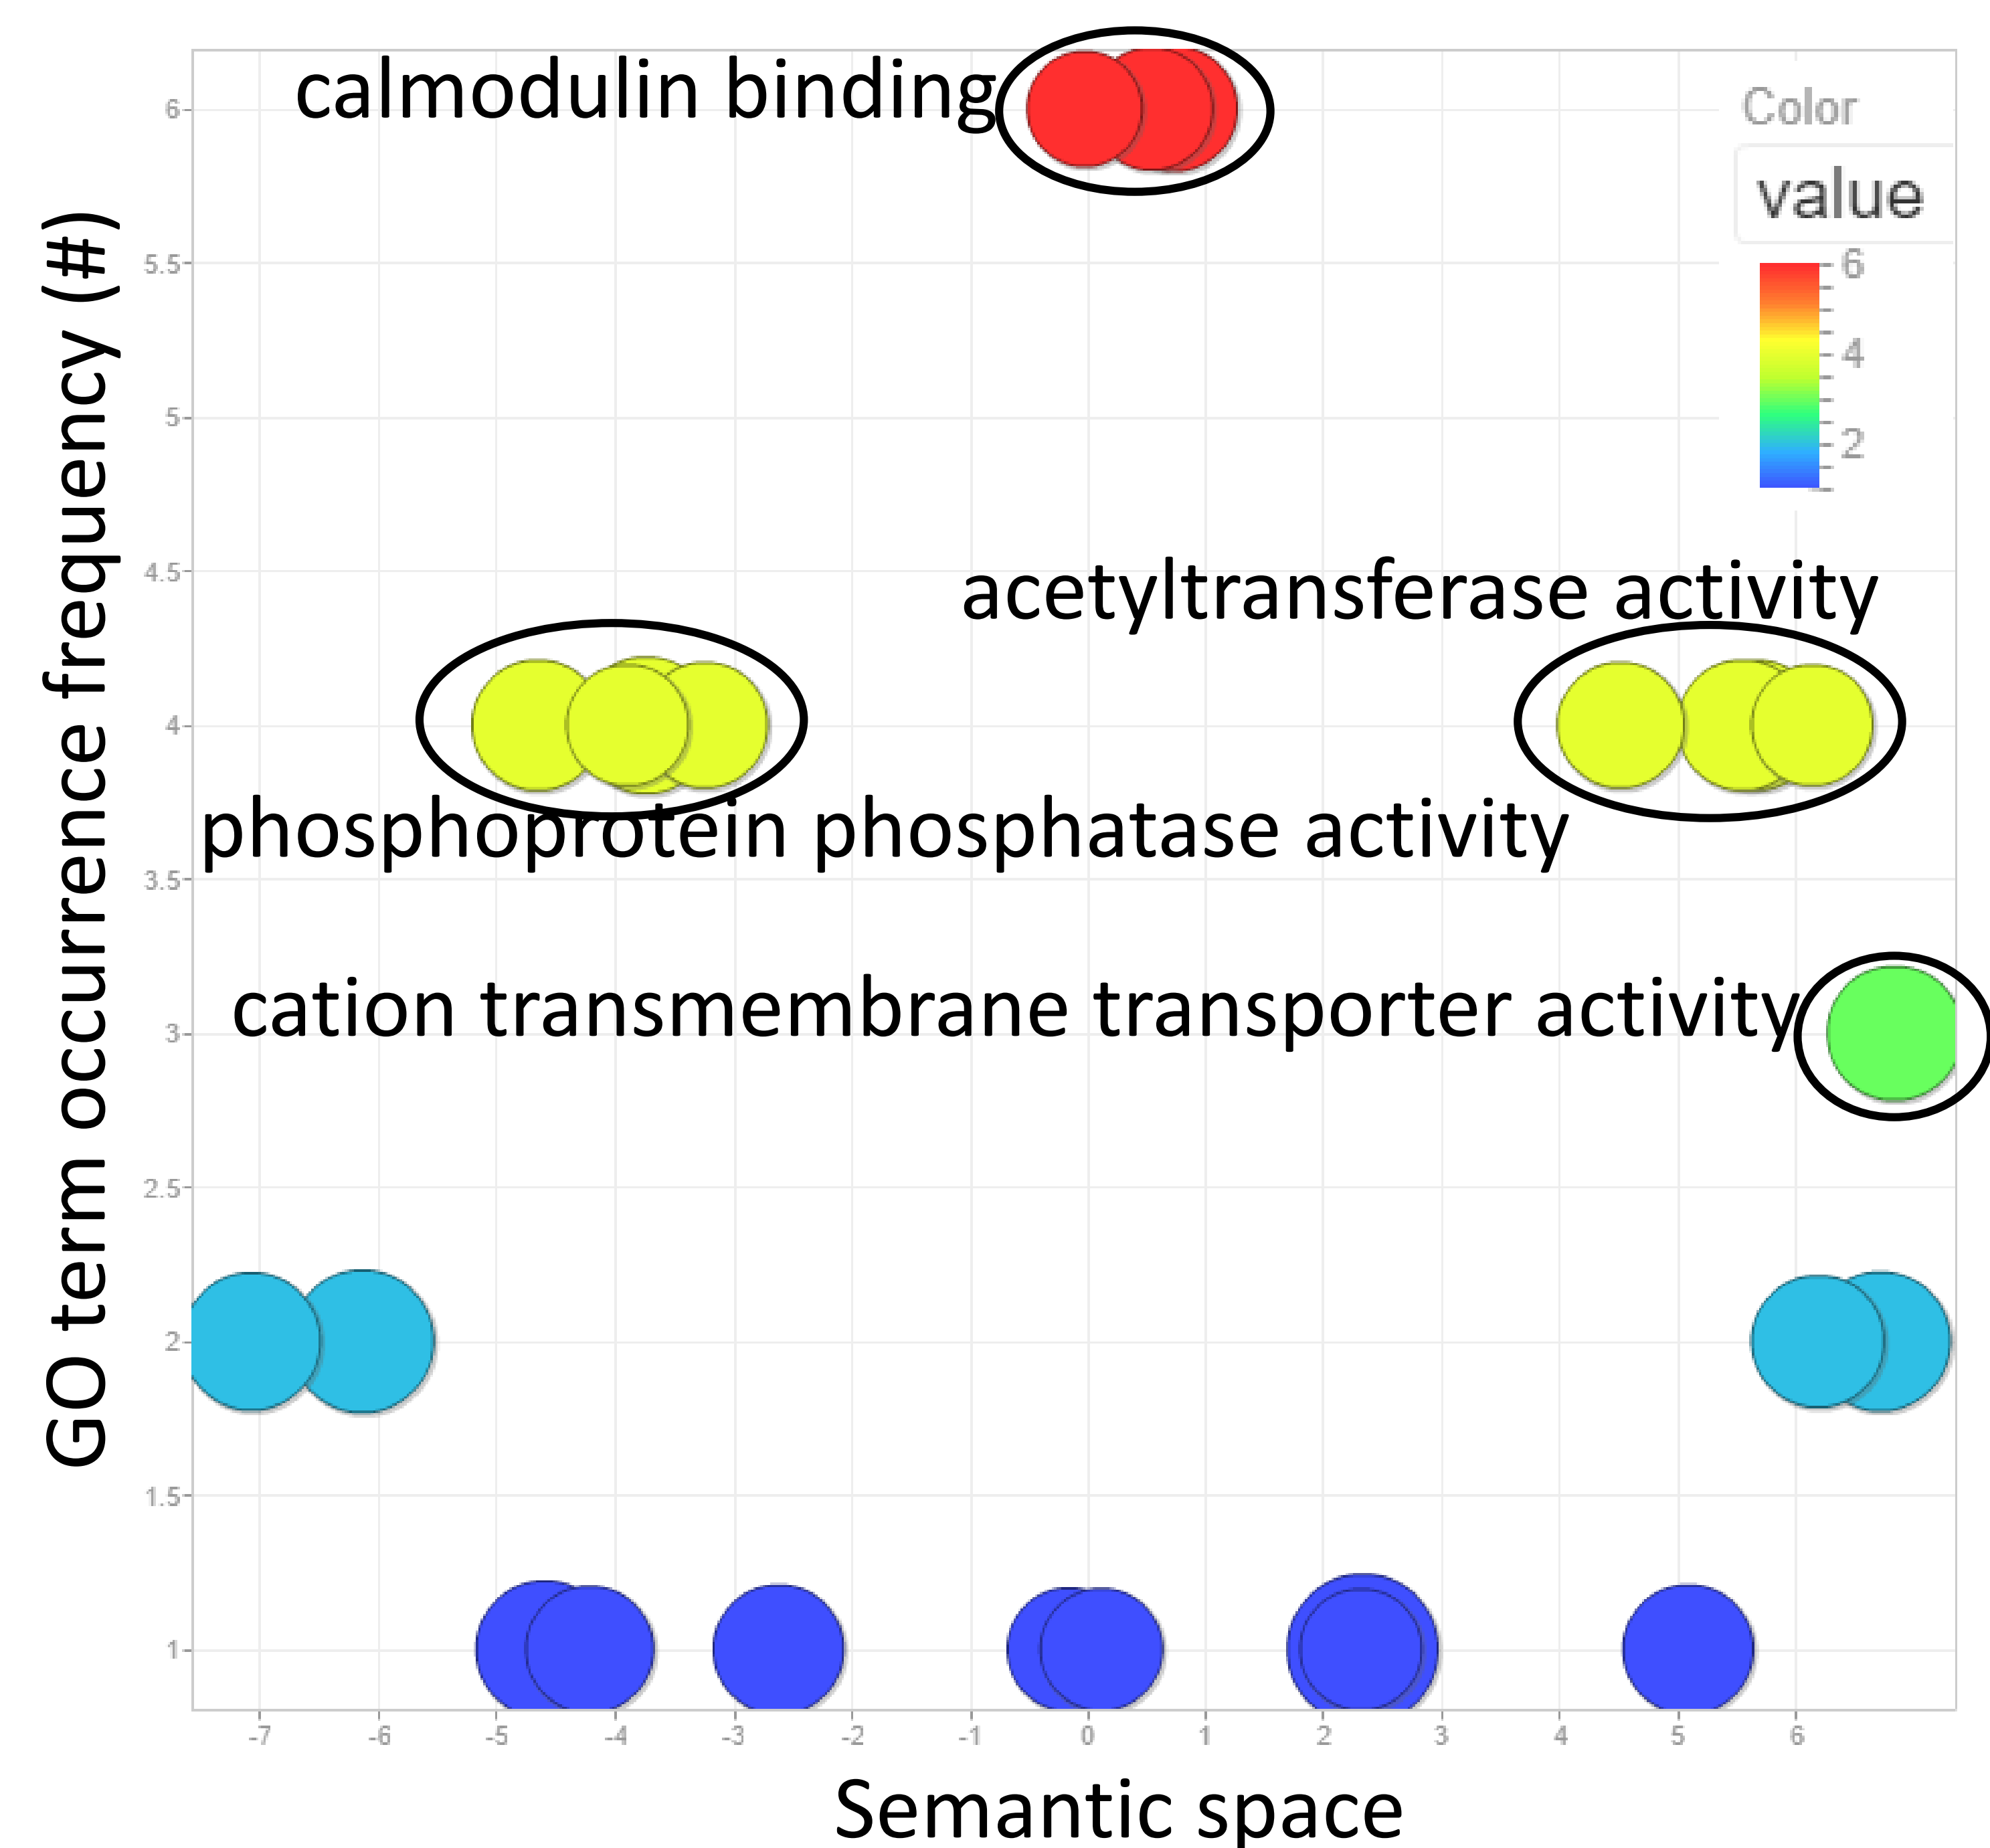

## c Metabolic gene cluster

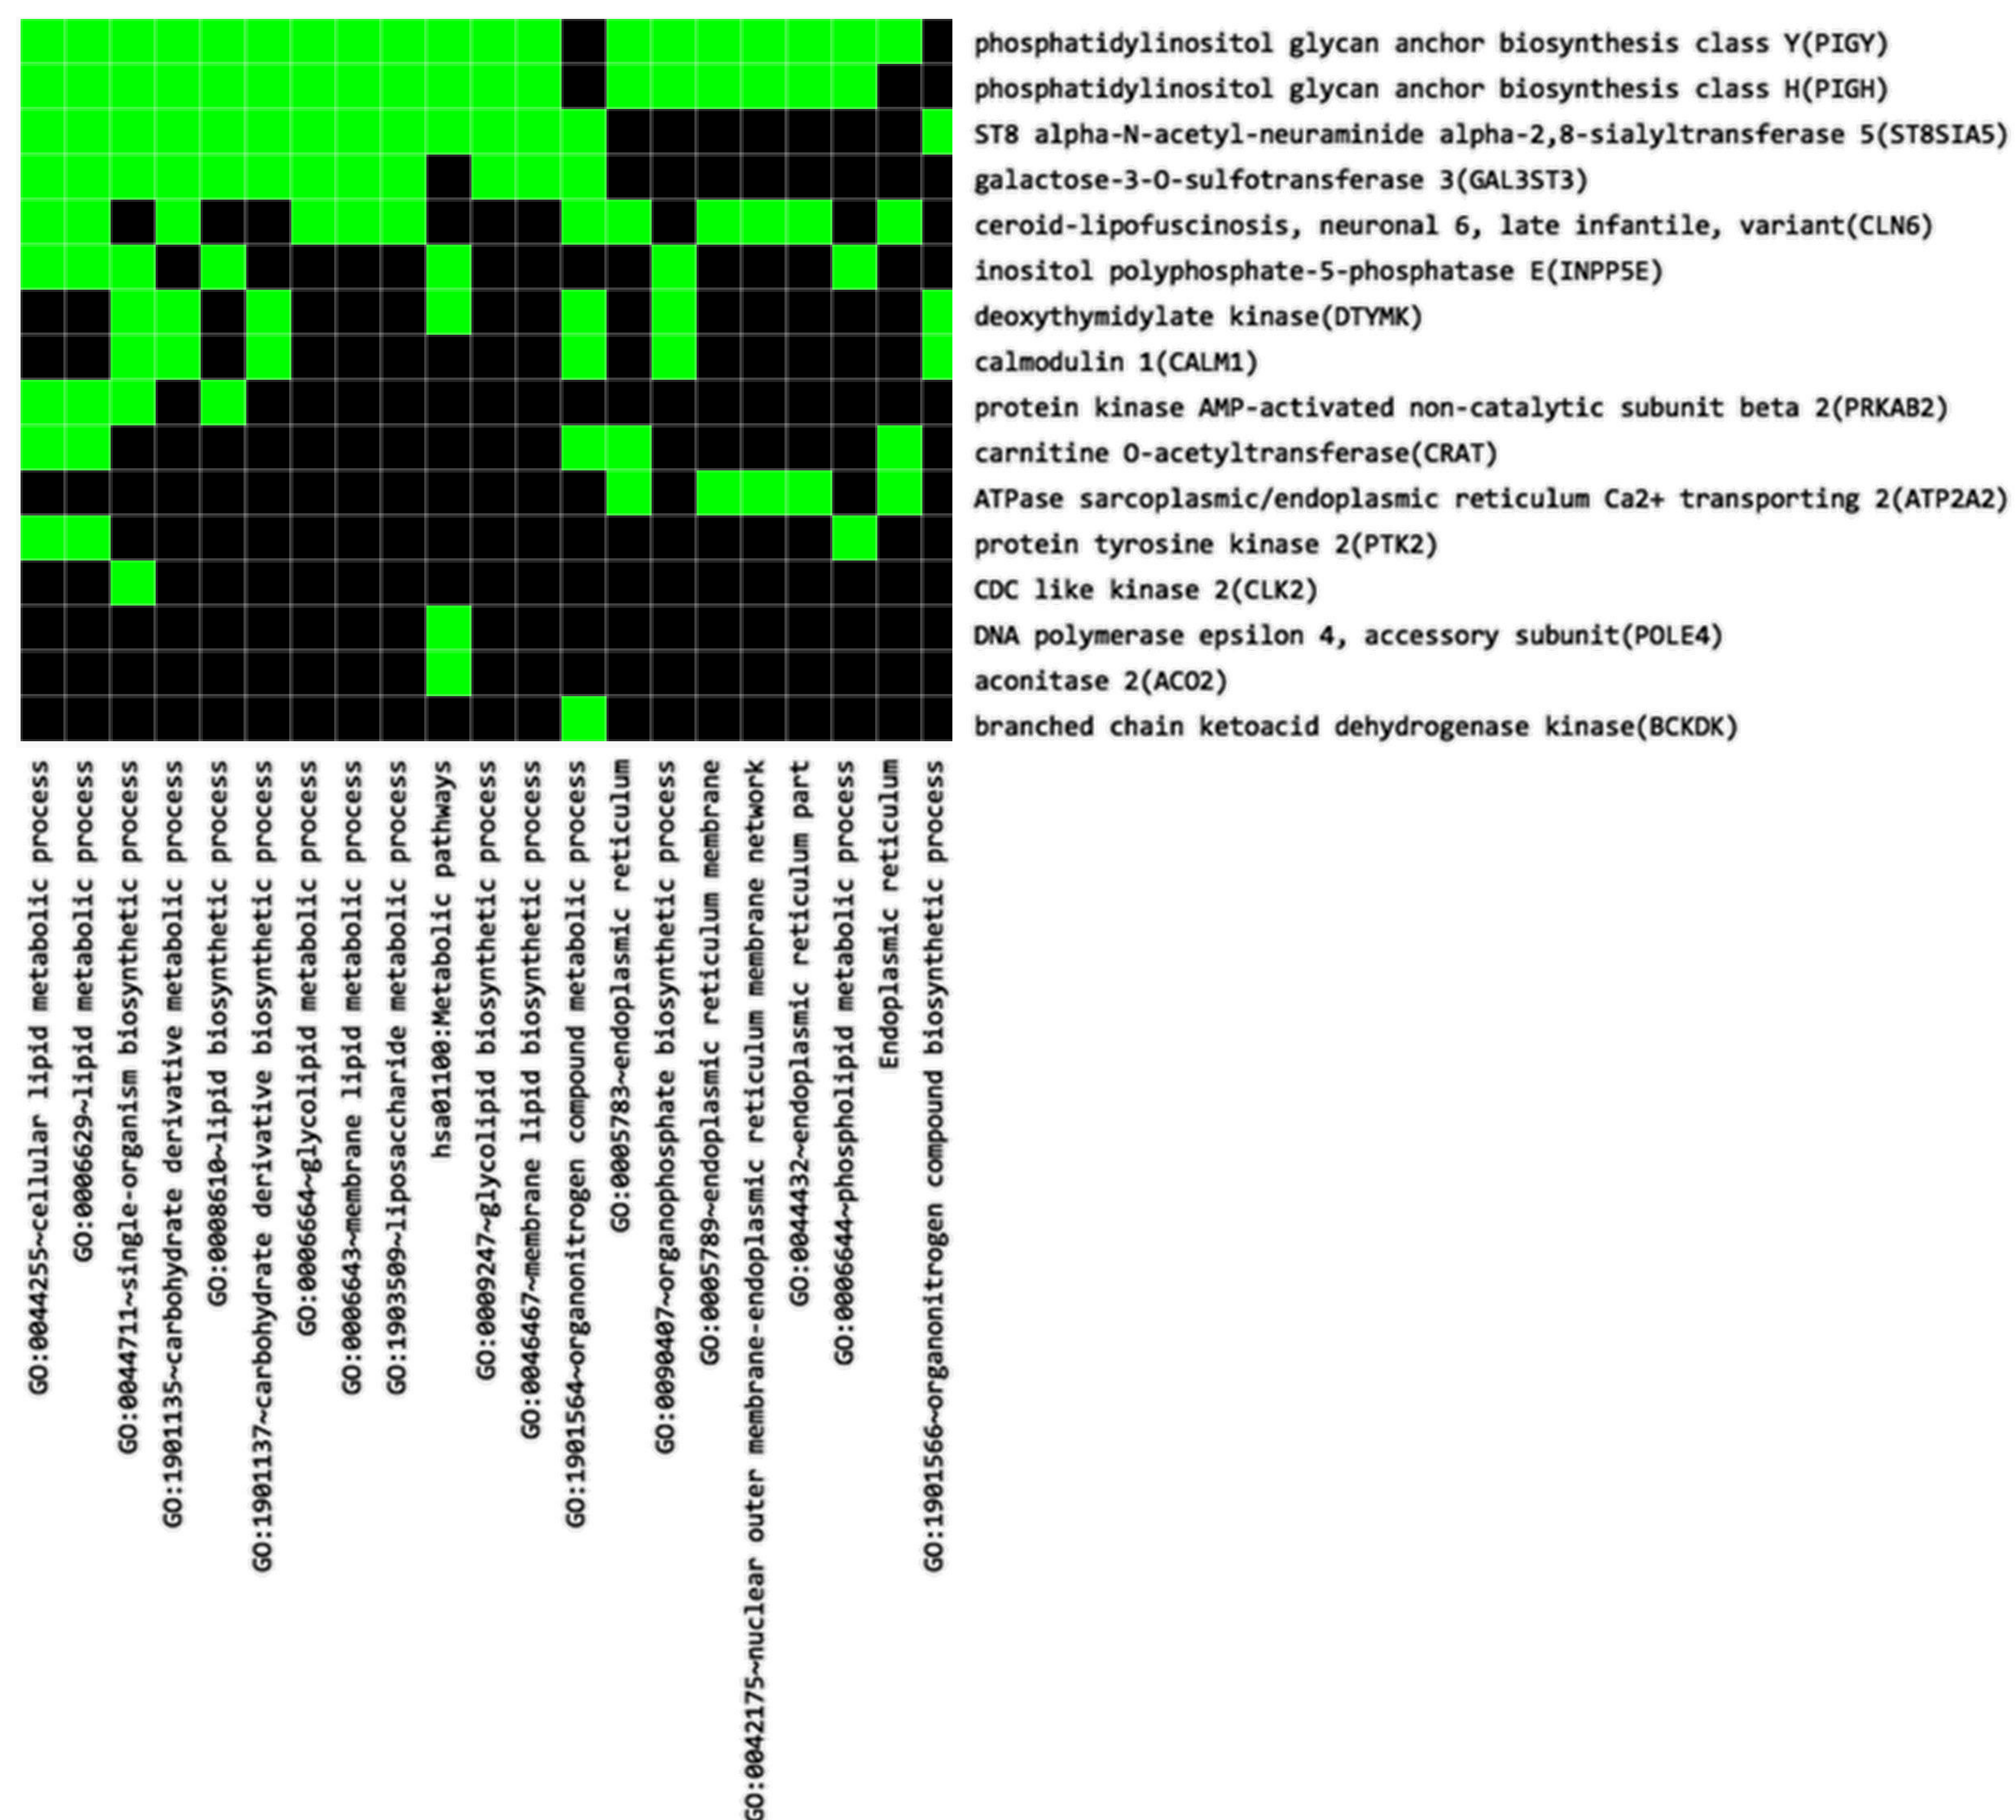

## d Mitochondrial gene cluster

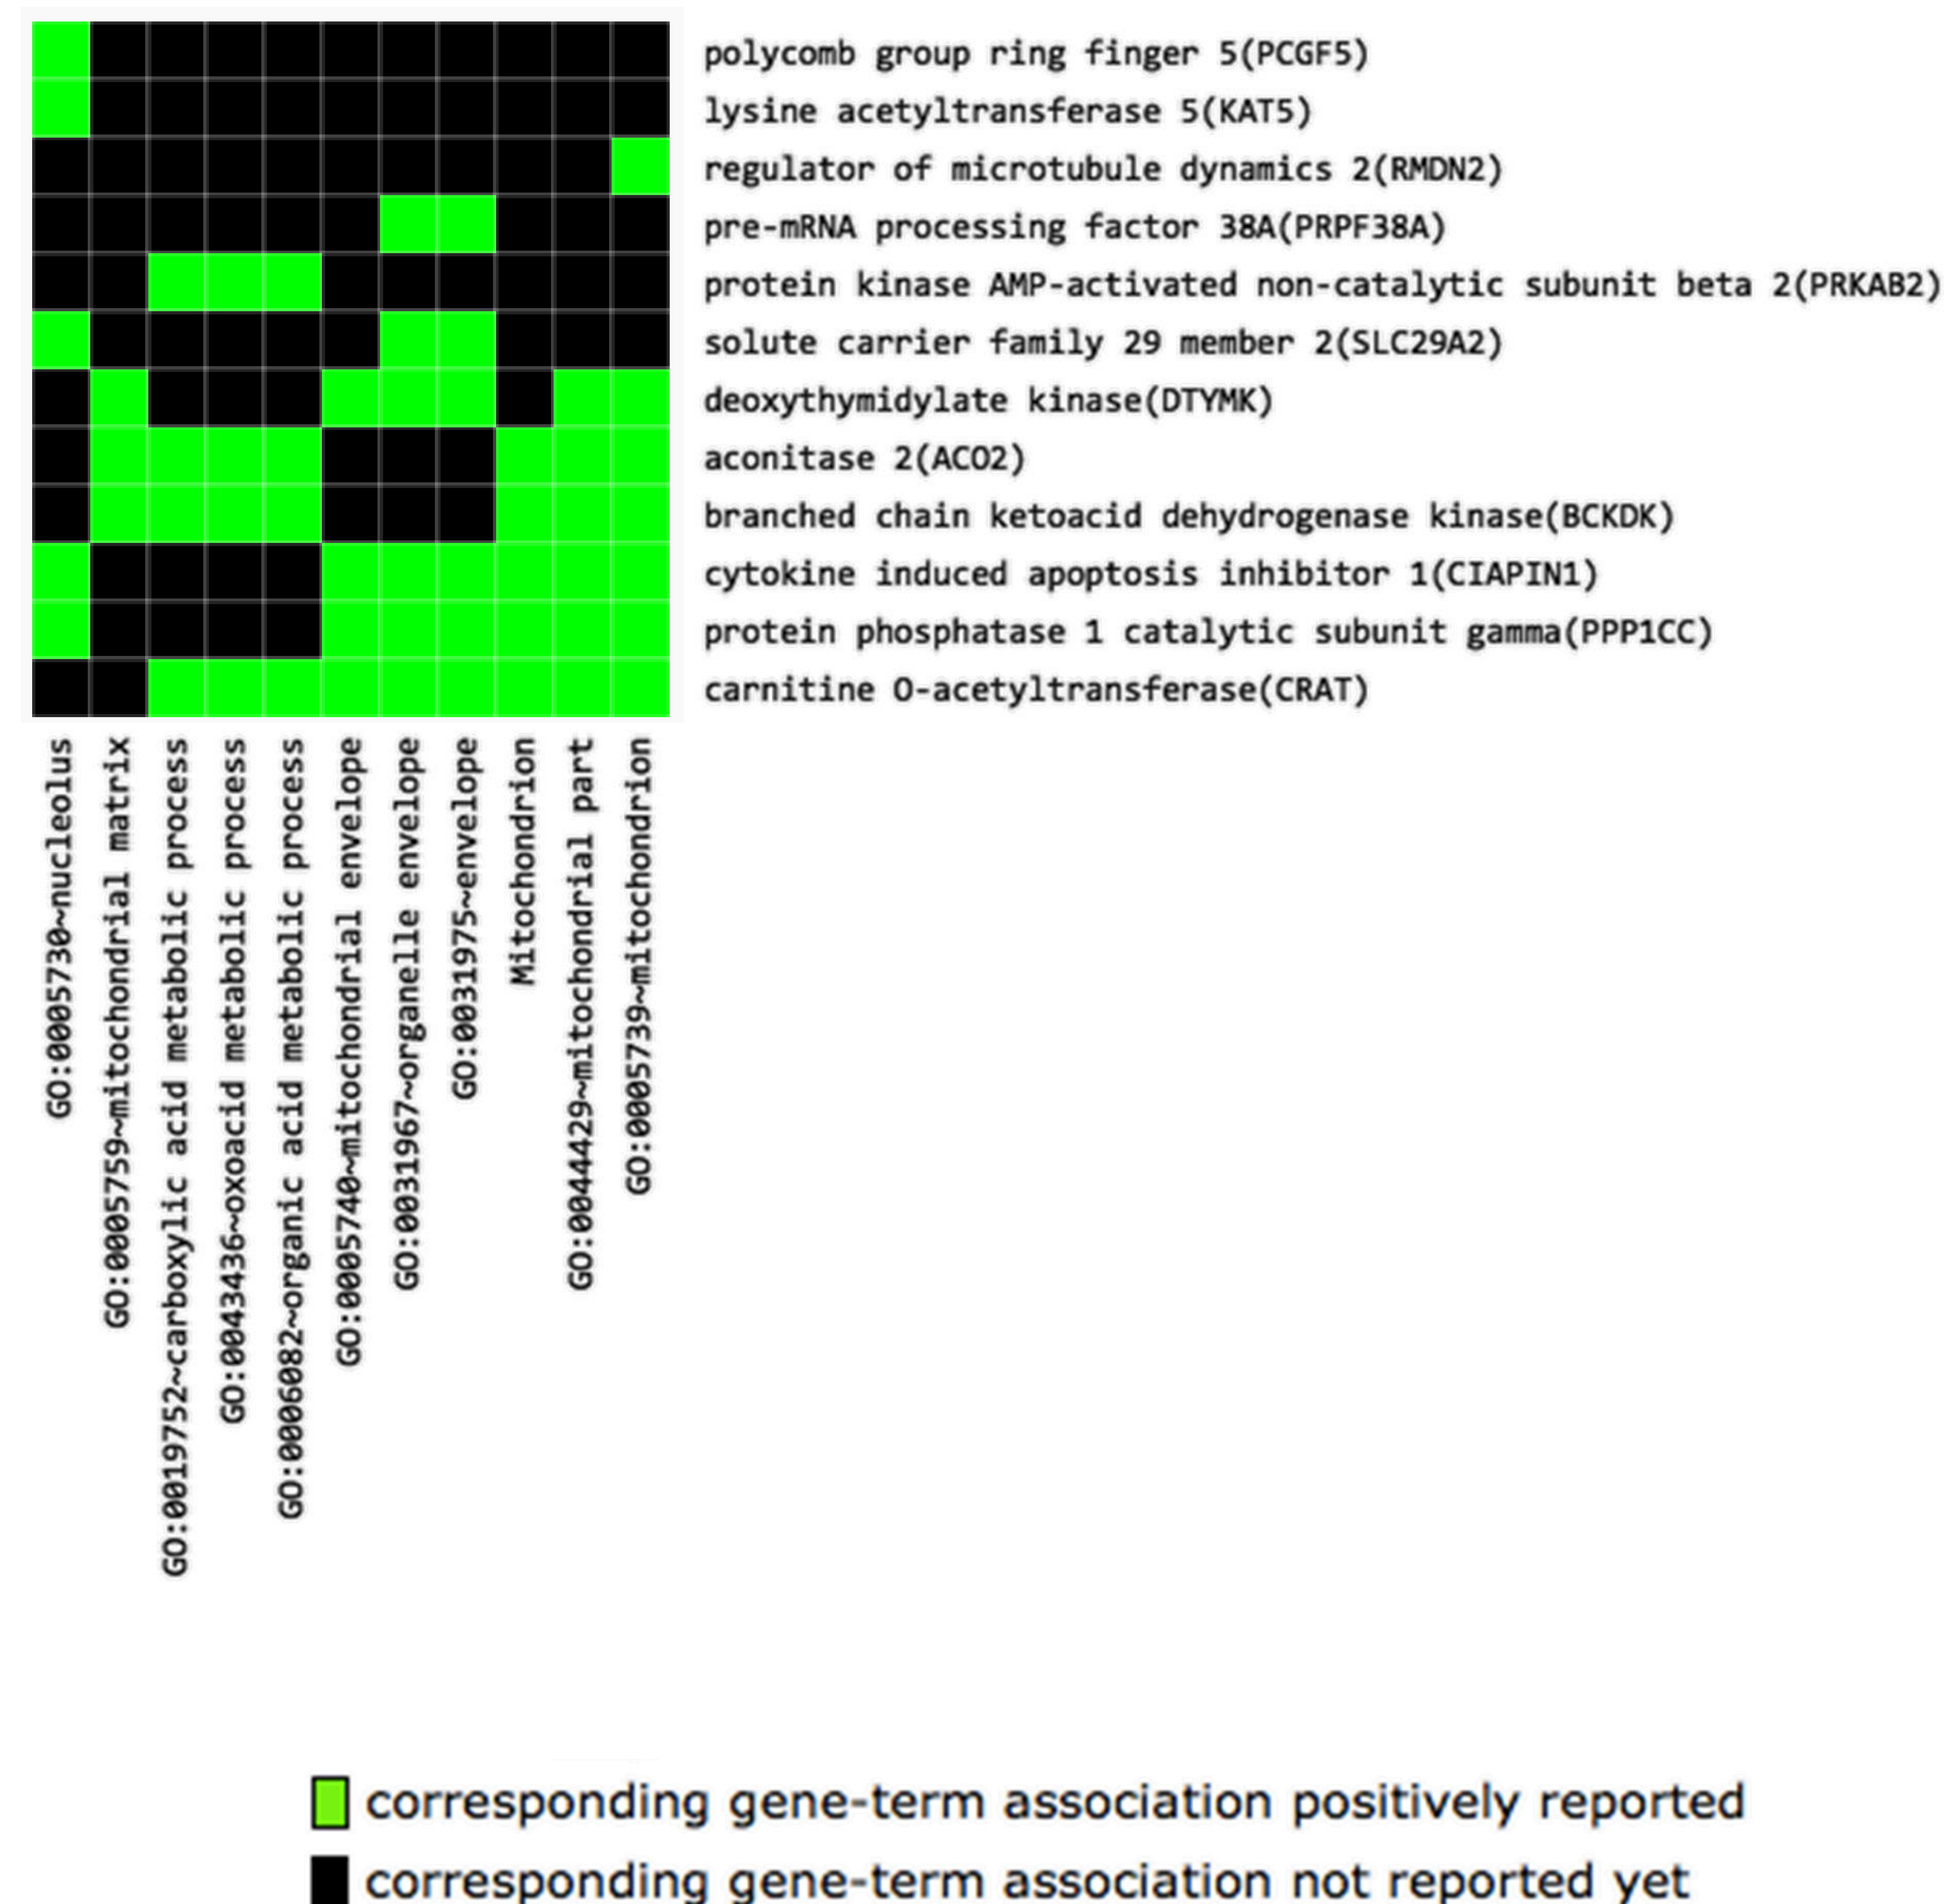

Supplement: 11064_2019_2789_MOESM5_ESM.pdf [file 11064_2019_2789_MOESM5_ESM.pdf]
